# Supplementary material for: Experimental–Density Functional Theory (DFT) Study of the Inhibitory Effect of Furan Residues in the Ziegler–Natta Catalyst during Polypropylene Synthesis
Source: MDPI journal article supplement (doi:10.3390/ijms241814368), 2023-09-21
Supplement: s1 [file s1]

*Supporting Information for*

**Experimental-density functional theory (DFT) study of the inhibitory effect of furan residues in the Ziegler-Natta catalyst during polypropylene synthesis**

**Joaquín Hernández-Fernández <sup>1,2,3,\*</sup>, Esneyder Puello-Polo <sup>4</sup> and Edgar Marquez <sup>5,\*</sup>**

<sup>1</sup> Chemistry Program, Department of Natural and Exact Sciences, San Pablo Campus, University of Cartagena, Cartagena 130015, Colombia

<sup>2</sup> Chemical Engineering Program, School of Engineering, Universidad Tecnológica de Bolívar, Parque Industrial y Tecnológico Carlos Vélez Pombo Km 1 Vía Turbaco, Cartagena 130001, Colombia

<sup>3</sup> Department of Natural and Exact Science, Universidad de la Costa, Barranquilla 080002, Colombia

<sup>4</sup> Group de Investigación en Oxi/Hidrotratamiento Catalítico Y Nuevos Materiales, Programa de Química-Ciencias Básicas, Universidad del Atlántico, Puerto Colombia 081001, Colombia

<sup>5</sup> Grupo de Investigaciones en Química Y Biología, Departamento de Química Y Biología, Facultad de Ciencias Básicas, Universidad del Norte, Carrera 51B, Km 5, Vía Puerto Colombia, Barranquilla 081007, Colombia

\* Correspondence: jhernandezf@unicartagena.edu.co (J.H.-F.); ebrazon@uninorte.edu.co (E.M.);

Tel.: +57-301-562-4990 (J.H.-F.)

All simulations were conducted using Density Functional Theory (DFT) and Gaussian 16 software. Geometry optimizations were performed using the B3LYP functional, which stands for Becke's three-parameter hybrid exchange-correlation functional (D. M. Becke) and Lee, Yang, and Parr (B3LYP), in reference to their respective contributors (Lee, Yang, and Parr) in the development of Density Functional Theory (DFT). This functional is widely utilized in computational chemistry and DFT calculations due to its ability to provide accurate results across a broad range of chemical systems.

The electronic configurations of atoms are described using a triple- $\xi$  basis set with a polarization function (Gaussian 6-311G basis set). After optimizing molecular structures, detailed energy calculations were performed using the B3LYP/6-311G method on the resulting geometries. The energy values obtained with this method are presented in this report because, as previously demonstrated, this approach yields results closer to experimental data. Moreover, the B3LYP method is widely recognized and employed in simulating catalytic systems involving transition metals.

List of Cartesian coordinates

#### Ziegler–Natta catalyst

|    |             |             |             |
|----|-------------|-------------|-------------|
| Mg | 2.68393000  | 2.81002700  | 0.00044400  |
| Mg | 4.14706300  | -0.74690400 | 0.02993200  |
| Mg | 5.58907800  | -4.15634900 | 0.30013100  |
| Mg | 6.49066600  | 2.27953800  | 0.07571300  |
| Mg | 7.97624200  | -1.30379900 | 0.20607100  |
| Mg | -1.08695500 | 3.09817400  | -0.12319800 |
| Mg | 0.40675100  | -0.42804800 | -0.01870400 |
| Mg | 1.90262200  | -4.00134000 | 0.09581200  |
| Mg | -3.36174400 | 0.04345300  | -0.11804000 |
| Mg | -1.87914600 | -3.57154500 | -0.03412600 |
| Mg | -5.66354900 | -3.07014400 | -0.03015900 |
| Mg | -7.05937700 | 0.48185200  | -0.35091800 |
| Mg | -9.36716100 | -2.34535900 | 0.29277000  |
| Mg | 10.19359400 | 1.66175700  | -0.26708100 |
| Cl | 4.39995200  | 1.36855100  | -1.35036000 |
| Cl | 4.73681200  | 3.85172100  | 0.80417600  |
| Cl | 0.86384200  | 4.36605100  | 0.58559600  |
| Cl | 0.68407500  | 1.73023200  | -1.43622900 |

|    |              |             |             |
|----|--------------|-------------|-------------|
| Cl | 2.36210100   | 0.59646700  | 1.29938400  |
| Cl | 5.86816900   | -2.18790500 | -1.22545200 |
| Cl | 6.14593700   | 0.06631900  | 1.39961200  |
| Cl | 2.18406900   | -1.82718300 | -1.24466300 |
| Cl | 3.83072200   | -2.86789800 | 1.55437300  |
| Cl | 7.78734100   | -3.66682300 | 1.09193000  |
| Cl | 3.79179600   | -5.55872100 | -0.45100200 |
| Cl | 8.00255200   | 0.72579100  | -1.41822400 |
| Cl | 8.59199200   | 3.18590300  | 0.84169700  |
| Cl | 10.11014200  | -0.50088200 | 0.96020100  |
| Cl | -3.03294300  | 2.16245200  | -1.62831800 |
| Cl | -1.37817200  | 0.97215000  | 1.21238400  |
| Cl | -1.56745500  | -1.37105200 | -1.35311300 |
| Cl | 0.12510200   | -2.57459500 | 1.39903800  |
| Cl | -0.09496400  | -5.13496400 | -0.70468500 |
| Cl | -5.08591000  | 1.54039800  | 1.01905600  |
| Cl | -5.28241800  | -0.93768000 | -1.47882100 |
| Cl | -3.58744000  | -2.06719200 | 1.31145500  |
| Cl | -3.94227800  | -4.69093300 | -0.68944300 |
| Cl | -7.14102200  | -1.42397800 | 1.39189400  |
| Cl | -7.79712800  | -3.92495200 | -0.78243400 |
| Cl | -9.25705900  | -0.20249100 | -0.99479200 |
| Cl | 11.99496800  | 2.33961200  | -1.45277600 |
| Cl | -11.18072900 | -2.94813000 | 1.49773300  |
| Cl | -2.98249700  | 4.38974500  | 0.80299400  |
| Cl | -6.91249400  | 2.72792500  | -1.39939600 |
| Cl | -4.80181600  | 5.43274400  | -1.98005000 |
| Ti | -4.79879500  | 3.65637300  | -0.66922200 |

## Furane

|   |             |            |             |
|---|-------------|------------|-------------|
| C | -0.54841400 | 0.99723800 | -0.00010400 |
| C | 0.81207300  | 1.00595200 | 0.00008200  |
| C | 1.22508400  | 2.38876100 | -0.00003800 |
| C | 0.09219000  | 3.14212400 | -0.00013100 |
| O | -1.02608700 | 2.30804600 | 0.00005900  |
| H | -1.29769200 | 0.23078600 | -0.00015400 |
| H | 1.45738200  | 0.14570200 | 0.00017300  |
| H | 2.23646500  | 2.75422600 | -0.00004500 |
| H | -0.11395600 | 4.19396700 | -0.00020200 |

## MgCl<sub>2</sub>-TiCl<sub>4</sub>-Furane

|    |             |             |             |
|----|-------------|-------------|-------------|
| Mg | 2.68393000  | 2.81002800  | 0.00043900  |
| Mg | 4.14706300  | -0.74690400 | 0.02993200  |
| Mg | 5.58907800  | -4.15634900 | 0.30013100  |
| Mg | 6.49066600  | 2.27953800  | 0.07571300  |
| Mg | 7.97624300  | -1.30379900 | 0.20607100  |
| Mg | -1.08696700 | 3.09846500  | -0.12312900 |
| Mg | 0.40674400  | -0.42803700 | -0.01873000 |
| Mg | 1.90262200  | -4.00134000 | 0.09581200  |
| Mg | -3.36187400 | 0.04341000  | -0.11820800 |
| Mg | -1.87912900 | -3.57153800 | -0.03411100 |
| Mg | -5.66361200 | -3.07017600 | -0.03019700 |
| Mg | -7.05772900 | 0.48080800  | -0.35052700 |
| Mg | -9.36720600 | -2.34531300 | 0.29281400  |
| Mg | 10.19359500 | 1.66175700  | -0.26708100 |
| Cl | 4.39995200  | 1.36855100  | -1.35036000 |
| Cl | 4.73681200  | 3.85172100  | 0.80417600  |
| Cl | 0.86399300  | 4.36585000  | 0.58554200  |
| Cl | 0.68407200  | 1.73023100  | -1.43623000 |
| Cl | 2.36210100  | 0.59646700  | 1.29938400  |

|    |              |             |             |
|----|--------------|-------------|-------------|
| Cl | 5.86816900   | -2.18790500 | -1.22545200 |
| Cl | 6.14593700   | 0.06631900  | 1.39961200  |
| Cl | 2.18406900   | -1.82718300 | -1.24466300 |
| Cl | 3.83072200   | -2.86789800 | 1.55437300  |
| Cl | 7.78734200   | -3.66682300 | 1.09193000  |
| Cl | 3.79179600   | -5.55872100 | -0.45100200 |
| Cl | 8.00255300   | 0.72579100  | -1.41822400 |
| Cl | 8.59199300   | 3.18590300  | 0.84169700  |
| Cl | 10.11014300  | -0.50088200 | 0.96020100  |
| Cl | -3.03343800  | 2.16261000  | -1.62811000 |
| Cl | -1.37815300  | 0.97211900  | 1.21231800  |
| Cl | -1.56746000  | -1.37107000 | -1.35309900 |
| Cl | 0.12510200   | -2.57459500 | 1.39903800  |
| Cl | -0.09496400  | -5.13496400 | -0.70468500 |
| Cl | -5.08630600  | 1.54093300  | 1.01883700  |
| Cl | -5.28243500  | -0.93765600 | -1.47891600 |
| Cl | -3.58742200  | -2.06717900 | 1.31147800  |
| Cl | -3.94227800  | -4.69093300 | -0.68944300 |
| Cl | -7.14164100  | -1.42397100 | 1.39187200  |
| Cl | -7.79712900  | -3.92495200 | -0.78243400 |
| Cl | -9.25712500  | -0.20221600 | -0.99486200 |
| Cl | 11.99496900  | 2.33961200  | -1.45277600 |
| Cl | -11.18073000 | -2.94813000 | 1.49773300  |
| Cl | -3.02381400  | 4.27295300  | 0.99058600  |
| Cl | -6.86343900  | 2.69301000  | -1.43906500 |
| Cl | -4.85931600  | 5.51408800  | -1.74723500 |
| Ti | -4.77074300  | 3.63439000  | -0.58162900 |
| C  | -0.96374900  | 4.31263500  | -3.11878100 |
| C  | -0.88079900  | 5.50157800  | -3.75185500 |
| C  | -1.01544500  | 6.54729600  | -2.76086800 |
| C  | -1.17405300  | 5.96207900  | -1.55588200 |
| O  | -1.15201400  | 4.54800000  | -1.72623800 |
| H  | -0.92148500  | 3.28478000  | -3.41621300 |
| H  | -0.74212800  | 5.64132400  | -4.80873200 |
| H  | -0.99764600  | 7.60583000  | -2.94691200 |
| H  | -1.30330100  | 6.30981700  | -0.55090400 |

#### TiCl<sub>4</sub>

|    |          |          |          |
|----|----------|----------|----------|
| Ti | 0.17891  | 0.02825  | 0.       |
| Cl | 0.94892  | 1.11718  | 1.88611  |
| Cl | 0.94888  | -2.14965 | 0.       |
| Cl | 0.94892  | 1.11718  | -1.88611 |
| Cl | -2.13109 | 0.02828  | 0.       |

#### Orbital energies and kinetic energies of TiCl<sub>4</sub> (alpha):

|    |   | 1           | 2          |
|----|---|-------------|------------|
| 1  | O | -179.037358 | 231.847693 |
| 2  | O | -101.574043 | 136.906749 |
| 3  | O | -101.574039 | 136.906781 |
| 4  | O | -101.573966 | 136.906695 |
| 5  | O | -101.573965 | 136.906845 |
| 6  | O | -20.075876  | 40.567531  |
| 7  | O | -16.789417  | 39.439718  |
| 8  | O | -16.789415  | 39.439719  |
| 9  | O | -16.789414  | 39.439722  |
| 10 | O | -9.492630   | 21.544415  |
| 11 | O | -9.492616   | 21.544603  |
| 12 | O | -9.492540   | 21.544497  |
| 13 | O | -9.492530   | 21.544625  |

|    |   |           |           |
|----|---|-----------|-----------|
| 14 | O | -7.251672 | 20.537600 |
| 15 | O | -7.251664 | 20.538347 |
| 16 | O | -7.251587 | 20.537448 |
| 17 | O | -7.251581 | 20.538895 |
| 18 | O | -7.248929 | 20.548014 |
| 19 | O | -7.248926 | 20.548563 |
| 20 | O | -7.248915 | 20.549487 |
| 21 | O | -7.248912 | 20.550403 |
| 22 | O | -7.248841 | 20.548004 |
| 23 | O | -7.248839 | 20.548561 |
| 24 | O | -7.248823 | 20.551772 |
| 25 | O | -7.248820 | 20.551971 |
| 26 | O | -2.512921 | 8.187089  |
| 27 | O | -1.621042 | 6.832505  |
| 28 | O | -1.621029 | 6.832581  |
| 29 | O | -1.621018 | 6.832671  |
| 30 | O | -0.847128 | 3.146445  |
| 31 | O | -0.836084 | 3.276643  |
| 32 | O | -0.836032 | 3.276473  |
| 33 | O | -0.835981 | 3.276324  |
| 34 | O | -0.420661 | 2.423180  |
| 35 | O | -0.409026 | 2.671677  |
| 36 | O | -0.408976 | 2.671277  |
| 37 | O | -0.408926 | 2.670957  |
| 38 | O | -0.391716 | 2.220005  |
| 39 | O | -0.391711 | 2.220018  |
| 40 | O | -0.378262 | 2.195072  |
| 41 | O | -0.378237 | 2.195003  |
| 42 | O | -0.378207 | 2.194935  |
| 43 | O | -0.346306 | 2.433491  |
| 44 | O | -0.346286 | 2.433391  |
| 45 | O | -0.346263 | 2.433352  |
| 46 | V | -0.160543 | 3.950402  |
| 47 | V | -0.160538 | 3.950425  |
| 48 | V | -0.136306 | 3.896470  |
| 49 | V | -0.136296 | 3.896324  |
| 50 | V | -0.136282 | 3.896227  |
| 51 | V | -0.009526 | 0.667792  |
| 52 | V | 0.033321  | 0.508849  |
| 53 | V | 0.033326  | 0.508813  |
| 54 | V | 0.033341  | 0.508818  |
| 55 | V | 0.150734  | 1.857188  |
| 56 | V | 0.184602  | 2.050740  |
| 57 | V | 0.184613  | 2.050646  |
| 58 | V | 0.184668  | 2.050857  |
| 59 | V | 0.312847  | 1.469119  |
| 60 | V | 0.393078  | 2.762256  |
| 61 | V | 0.393096  | 2.762238  |
| 62 | V | 0.397747  | 2.652776  |
| 63 | V | 0.397755  | 2.652655  |
| 64 | V | 0.397768  | 2.652545  |
| 65 | V | 0.500572  | 2.787019  |
| 66 | V | 0.500577  | 2.786893  |
| 67 | V | 0.500584  | 2.786952  |
| 68 | V | 0.507431  | 2.812474  |
| 69 | V | 0.522555  | 2.531453  |
| 70 | V | 0.522592  | 2.531518  |
| 71 | V | 0.522616  | 2.531729  |
| 72 | V | 0.562611  | 2.486443  |
| 73 | V | 0.562635  | 2.486349  |
| 74 | V | 0.562653  | 2.486125  |
| 75 | V | 0.609710  | 3.519196  |
| 76 | V | 0.609722  | 3.519157  |

|     |   |          |           |
|-----|---|----------|-----------|
| 77  | V | 0.768623 | 3.599164  |
| 78  | V | 0.768707 | 3.598847  |
| 79  | V | 0.768827 | 3.598452  |
| 80  | V | 0.784164 | 2.801796  |
| 81  | V | 0.805169 | 2.626330  |
| 82  | V | 0.805202 | 2.626325  |
| 83  | V | 0.805235 | 2.626323  |
| 84  | V | 0.833322 | 2.627013  |
| 85  | V | 0.833327 | 2.626995  |
| 86  | V | 0.833621 | 2.628099  |
| 87  | V | 0.833647 | 2.628071  |
| 88  | V | 0.833666 | 2.628087  |
| 89  | V | 0.840435 | 2.747796  |
| 90  | V | 0.840462 | 2.747937  |
| 91  | V | 0.840512 | 2.748288  |
| 92  | V | 1.002297 | 3.061026  |
| 93  | V | 1.002355 | 3.060865  |
| 94  | V | 1.002404 | 3.061146  |
| 95  | V | 1.083828 | 2.909579  |
| 96  | V | 1.129886 | 3.624229  |
| 97  | V | 1.129899 | 3.624251  |
| 98  | V | 1.344327 | 3.716542  |
| 99  | V | 1.344342 | 3.716447  |
| 100 | V | 1.344352 | 3.716360  |
| 101 | V | 1.976852 | 3.654937  |
| 102 | V | 1.976900 | 3.654988  |
| 103 | V | 1.976915 | 3.655024  |
| 104 | V | 2.026256 | 3.869361  |
| 105 | V | 2.026308 | 3.869694  |
| 106 | V | 2.026390 | 3.870032  |
| 107 | V | 2.161727 | 3.962810  |
| 108 | V | 4.224045 | 14.870735 |
| 109 | V | 4.224066 | 14.870753 |
| 110 | V | 4.224076 | 14.870724 |
| 111 | V | 4.244815 | 14.537805 |
| 112 | V | 5.186209 | 9.379947  |

Total kinetic energy from orbitals= 2.683023492946D+03

#### Furan orbital symmetries:

|          |     |     |     |     |     |     |     |     |     |     |     |     |
|----------|-----|-----|-----|-----|-----|-----|-----|-----|-----|-----|-----|-----|
| Occupied | (A) |
|          | (A) | (A) | (A) | (A) | (A) | (A) |     |     |     |     |     |     |
| Virtual  | (A) |
|          | (A) |
|          | (A) |
|          | (A) |
|          | (A) |
|          | (A) | (A) | (A) | (A) | (A) |     |     |     |     |     |     |     |

The electronic state is 1-A.

|       |                   |    |           |           |           |           |           |
|-------|-------------------|----|-----------|-----------|-----------|-----------|-----------|
| Alpha | occ. eigenvalues  | -- | -19.21133 | -10.23164 | -10.23162 | -10.18441 | -10.18400 |
| Alpha | occ. eigenvalues  | -- | -1.10325  | -0.79265  | -0.73937  | -0.59314  | -0.56552  |
| Alpha | occ. eigenvalues  | -- | -0.53650  | -0.44173  | -0.44170  | -0.40765  | -0.39336  |
| Alpha | occ. eigenvalues  | -- | -0.36673  | -0.27346  | -0.22446  |           |           |
| Alpha | virt. eigenvalues | -- | 0.01968   | 0.07854   | 0.11754   | 0.14136   | 0.15499   |
| Alpha | virt. eigenvalues | -- | 0.16640   | 0.19596   | 0.20562   | 0.31421   | 0.37861   |
| Alpha | virt. eigenvalues | -- | 0.43335   | 0.51524   | 0.53358   | 0.58138   | 0.58180   |
| Alpha | virt. eigenvalues | -- | 0.58518   | 0.59287   | 0.61487   | 0.62906   | 0.67559   |
| Alpha | virt. eigenvalues | -- | 0.67949   | 0.80098   | 0.82841   | 0.84199   | 0.90760   |
| Alpha | virt. eigenvalues | -- | 0.90838   | 0.98223   | 0.98778   | 1.01655   | 1.03533   |
| Alpha | virt. eigenvalues | -- | 1.13400   | 1.13870   | 1.34885   | 1.37562   | 1.38539   |
| Alpha | virt. eigenvalues | -- | 1.39393   | 1.53567   | 1.55389   | 1.56626   | 1.57378   |
| Alpha | virt. eigenvalues | -- | 1.68078   | 1.84147   | 1.93158   | 2.01352   | 2.05462   |
| Alpha | virt. eigenvalues | -- | 2.08610   | 2.19764   | 2.21966   | 2.25993   | 2.26051   |

|                            |         |         |         |         |         |
|----------------------------|---------|---------|---------|---------|---------|
| Alpha virt. eigenvalues -- | 2.32028 | 2.39875 | 2.57389 | 2.62504 | 2.62911 |
| Alpha virt. eigenvalues -- | 2.70320 | 2.78274 | 2.93198 | 2.94843 | 3.10078 |
| Alpha virt. eigenvalues -- | 3.93769 | 4.14799 | 4.14936 |         |         |
